# Supplementary material
Source: PubMed Central journal article supplement (PMC7735674)
Supplement: bm0c00516_si_001.pdf [file bm0c00516_si_001.pdf]

Supplementary Material (ESI)

***Fabrication of biohybrid cellulose acetate-collagen bilayer matrices as nanofibrous spongy dressing material for wound healing application***

Giriprasath Ramanathan<sup>a,c</sup>, Liji Sobhana Seleenmary Sobhanadhas<sup>b</sup>, Grace Felciya Sekar Jeyakumar<sup>a</sup>, Vimala Devi<sup>a</sup>, Uma Tiruchirapalli Sivagnanam<sup>a,\*</sup>, Pedro Fardim<sup>b,c,\*</sup>

<sup>a</sup>*Biological Materials Lab, CSIR-Central Leather Research Institute (CLRI), Adyar, Chennai, India*

<sup>b</sup>*Laboratory of Fibre and Cellulose Technology, Abo Akademi University, Porthansgatan 3, FI-20500 Abo, Finland*

<sup>c</sup>*Chemical Engineering for Health & Care, Bio&Chemical Systems Technology, Reactor Engineering and Safety, Department of Chemical Engineering, KU Leuven, Celestijnenlaan 200F bus 2424, B-3001 Leuven, Belgium*

† Electronic Supplementary Information (ESI) available: Tables and Figure.

| <b>Contents:</b>      | <b>Page No.</b> |
|-----------------------|-----------------|
| Supplementary Table   | 02              |
| Supplementary Figures | 03              |

**Supplementary Table**

Table S1 Results of different models in terms of  $r^2$ , slope and intercept

| Model Name                     | L      |        |           | D      |        |           |
|--------------------------------|--------|--------|-----------|--------|--------|-----------|
|                                | $r^2$  | Slope  | Intercept | $r^2$  | Slope  | Intercept |
| <b>Zero order model</b>        | 0.9815 | 0.8591 | 33.872    | 0.6677 | 0.7363 | 31.597    |
| <b>First order model</b>       | 0.8403 | 0.0098 | 1.8172    | 0.7987 | 0.0069 | 1.8286    |
| <b>Higuchi model</b>           | 0.8938 | 9.3508 | 15.152    | 0.8837 | 8.0703 | 15.305    |
| <b>Korsmeyer -Peppas model</b> | 0.631  | 0.6097 | 0.9461    | 0.6151 | 0.5838 | 0.9378    |

**Supplementary Figures:**

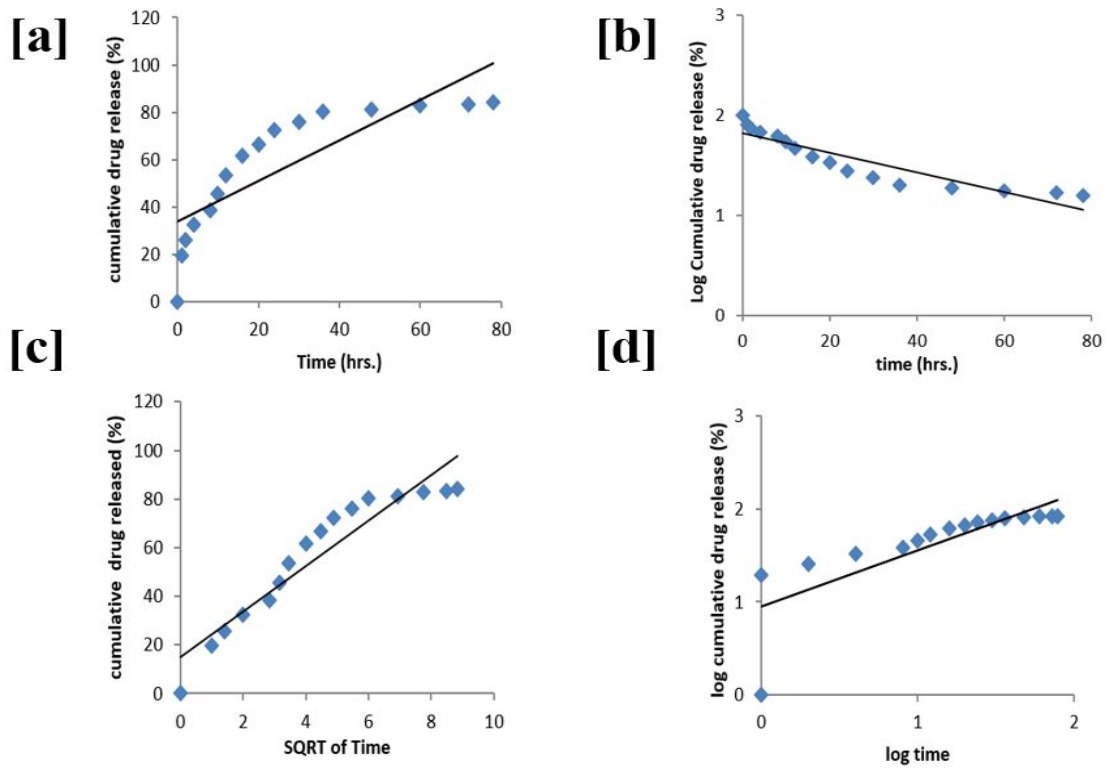

Figure S1 Drug release data fitted to various kinetic models for the CA:L-CSPG bilayer matrix (A) Zero order (B) First order (C) Higuchi model and (D) Korsmeyer-Peppas drug diffusion model.

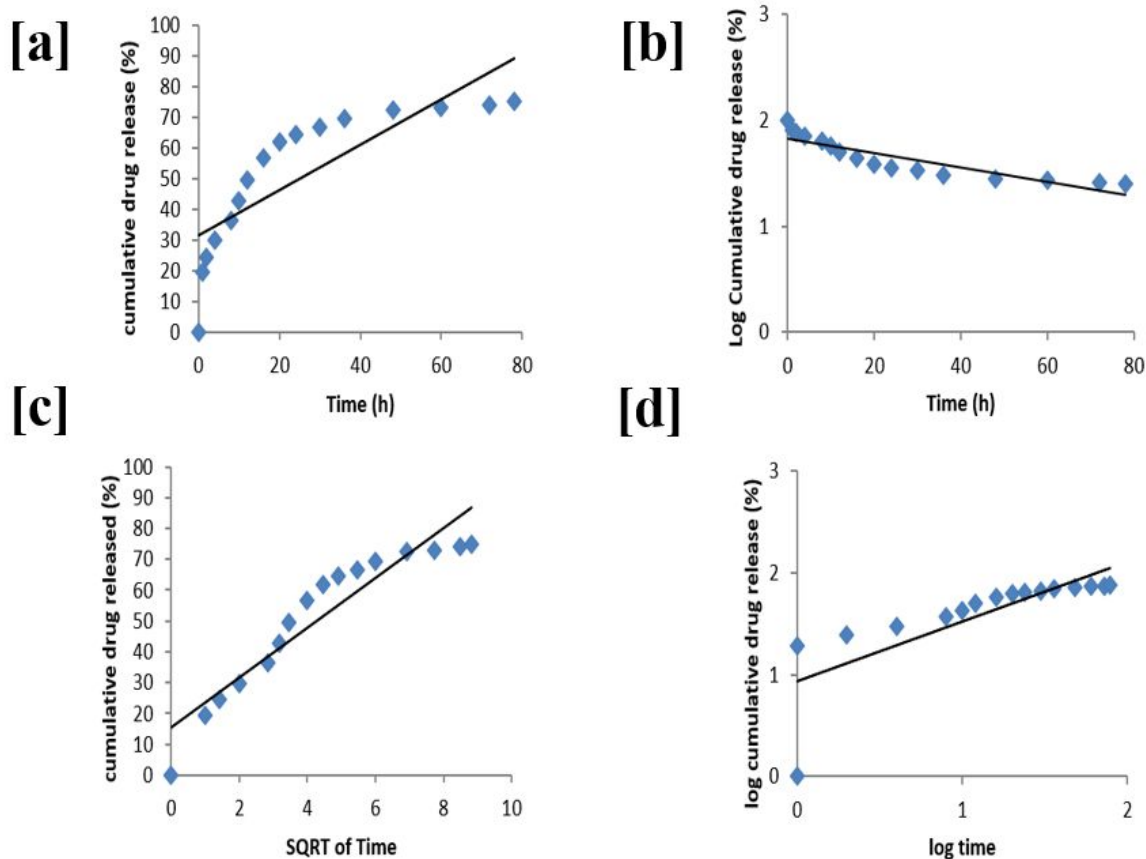

Figure S2 Drug release data fitted to various kinetic models for the CA:D-CSPG bilayer matrix (A) Zero order (B) First order (C) Higuchi model and (D) Korsmeyer-Peppas drug diffusion model

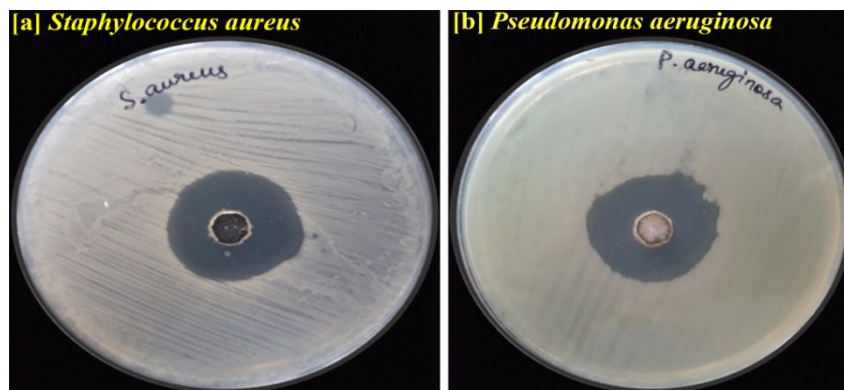

Figure S3 Antimicrobial activity of the latex using: (a) *Staphylococcus aureus*, (b) *Pseudomonas aeruginosa*
